# Supplementary material for: Cyclometalated ruthenium complexes for sensitizing nanocrystalline TiO2 solar cells
Source: Royal Society of Chemistry journal article supplement (doi:10.1039/b703636a), 2007-01-01
Supplement: b703636a.pdf [file b703636a.pdf]

### X-ray crystal structure determination of **3**

Crystal suitable for X-ray analysis were obtained by slow concentration of a acetonitril solution of **3**.  $[\text{C}_{64}\text{H}_{43}\text{N}_{10}\text{O}_4\text{Ru}_2](\text{PF}_6) \cdot 3 \text{CH}_3\text{CN}$ , Fw = 1486.36, dark red needle, 0.30 x 0.12 x 0.06 mm<sup>3</sup>, triclinic,  $\overline{P1}$  (no.2),  $a = 9.5350(1)$ ,  $b = 15.4639(2)$ ,  $c = 21.5139(3)$  Å,  $\alpha = 97.2304(4)$ ,  $\beta = 96.0597(5)$ ,  $\gamma = 92.7702(6)^\circ$ ,  $V = 3123.27(7)$  Å<sup>3</sup>,  $Z = 2$ ,  $D_x = 1.580$  g/cm<sup>3</sup>,  $\mu = 0.59$  mm<sup>-1</sup>. 57455 Reflections were measured on a Nonius Kappa CCD diffractometer with rotating anode (graphite monochromator,  $\lambda = 0.71073$  Å) up to a resolution of  $(\sin \theta/\lambda)_{\text{max}} = 0.65$  Å<sup>-1</sup> at a temperature of 110 K. An absorption correction based on multiple measured reflections was applied (0.94-0.97 correction range). 14126 Reflections were unique ( $R_{\text{int}} = 0.048$ ). The structure was solved with automated Patterson methods (program DIRDIF-99<sup>[1]</sup>) and refined with SHELXL-97<sup>[2]</sup> against  $F^2$  of all reflections. Non-hydrogen atoms were refined with anisotropic displacement parameters. Hydrogen atoms were introduced in calculated positions and refined with a riding model. The assignment of C11/N12 and C21/N22 was based on the refinements of the occupancies on the corresponding sites. The PF<sub>6</sub> anion and one acetonitrile molecule were disordered. 941 Parameters were refined with 447 restraints.  $R1/wR2 [I > 2\sigma(I)]: 0.0362/0.0878$ .  $R1/wR2 [\text{all refl.}]: 0.0500/0.0955$ .  $S = 1.035$ . Residual electron density between -0.83 and 1.77 e/Å<sup>3</sup>. Geometry calculations and checking for higher symmetry was performed with the PLATON program<sup>[3]</sup>.

### References

- [1] Beurskens, P. T.; Admiraal, G.; Beurskens, G.; Bosman, W. P.; Garcia-Granda, S.; Gould, R. O.; Smits, J. M. M.; Smykalla C. *The DIRDIF99 program system*, Technical Report of the Crystallography Laboratory at University of Nijmegen; University of Nijmegen: Nijmegen, The Netherlands, 1999.
- [2] Sheldrick, G. M. *SHELXL-97. Program for crystal structure refinement*; Universität Göttingen: Göttingen, Germany, 1997.
- [3] Spek, A. L. *J. Appl. Cryst.* **2003**, *36*, 7-13.
